# Supplementary material for: Heat shock in C. elegans induces downstream of gene transcription and accumulation of double-stranded RNA
Source: PLoS One. 2019 Apr 8;14(4):e0206715. doi: 10.1371/journal.pone.0206715 (PMC6453478; doi:10.1371/journal.pone.0206715)
Supplement: S1 Table — (XLSX) [file pone.0206715.s013.xlsx]

## Sheet: Sheet1
Supplementary Table 1 - Strains used in this study
Strains	Genotype	Source
N2- CGCB	Wild type	CGC
CL6311	tdp-1(ok803) II X8 outcross to CGC- N2B		Original allele from CGC; University of Minnesota, MN, outcrossed in house
OG497	drSi13 II; unc-119(ed3) III.	CGC
CL6491	hsf-1(sy441)V	CGC
CL6211	rde-4 (N337)III	CGC
